# Supplementary material
Source: Copernicus journal article supplement (doi:10.5194/cp-22-1057-2026)
Supplement: Supplementary file [file cp-22-1057-2026-supplement-title-page.pdf › cp-22-1057-2026-supplement-title-page.pdf]

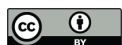

## *Supplement of*

# **Cryptotephra in the East Antarctic Mount Brown South ice core**

**Margaret M. Harlan et al.**

*Correspondence to:* Margaret M. Harlan (mharlan@ualberta.ca)

- cp-22-1057-2026-supplement-title-page.pdf
- Harlan\_2024\_supplementary\_materials\_geochemistry.xlsx
- Supplementary\_figures.pdf

The copyright of individual parts of the supplement might differ from the article licence.
